# Supplementary material
Source: PubMed Central journal article supplement (PMC196901)

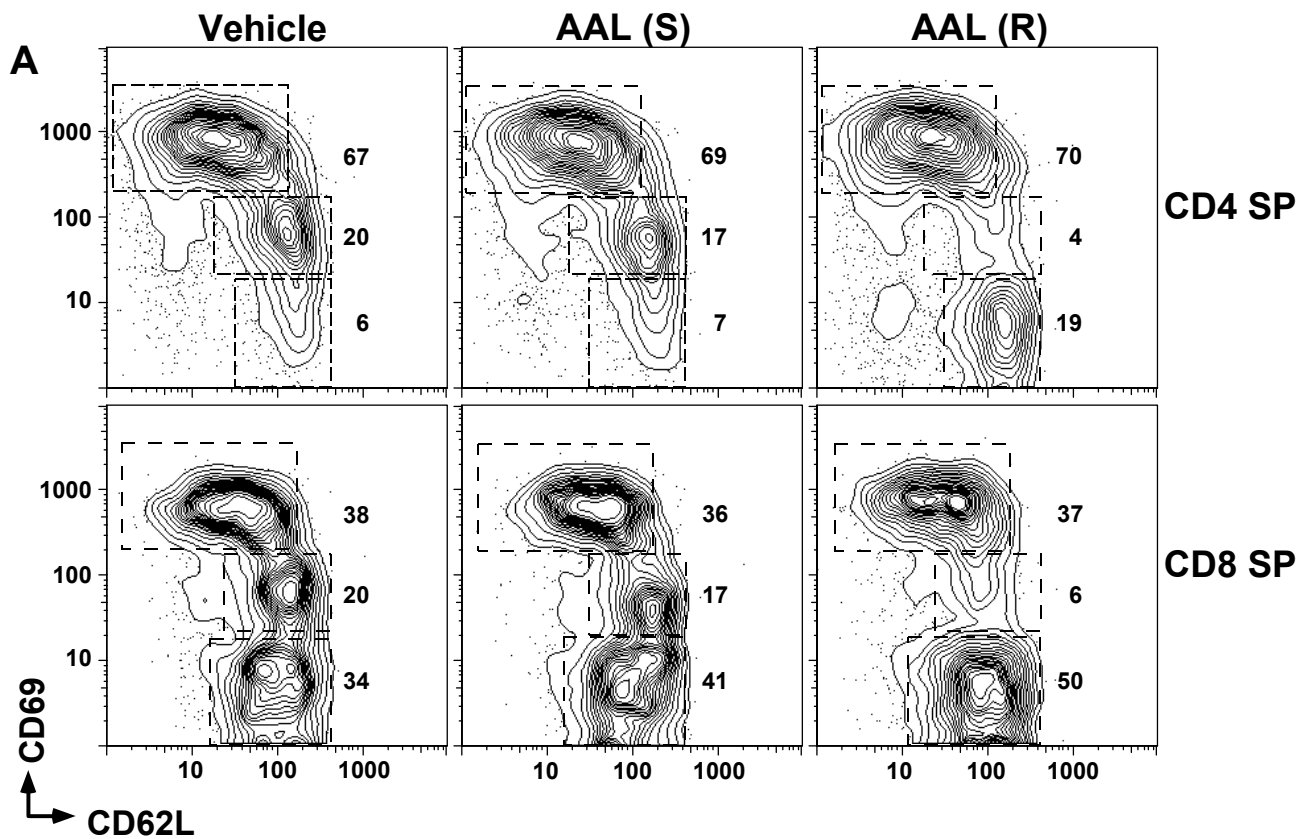

Supplement: pnas_100_19_10907__2.pdf [file pnas_100_19_10907__2.pdf]

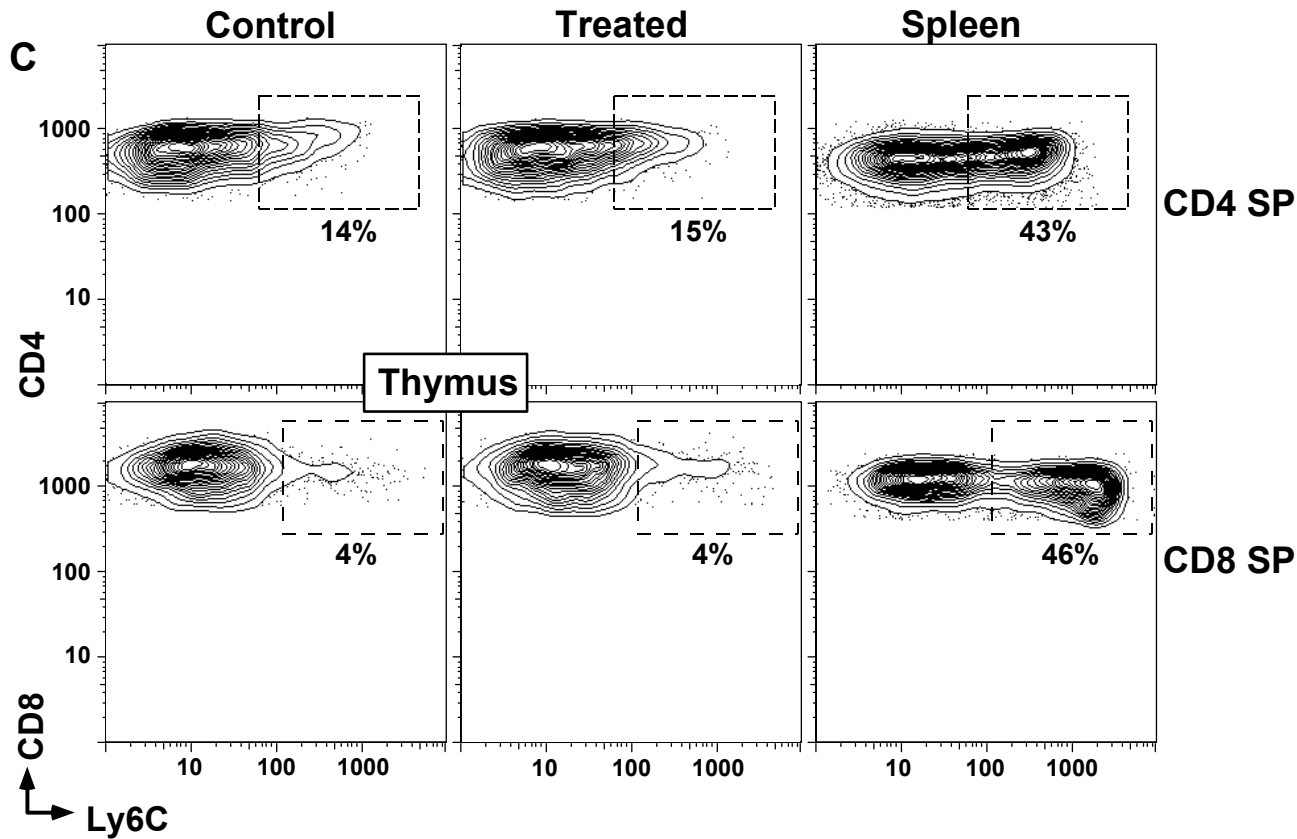

Supplement: pnas_100_19_10907__4.pdf [file pnas_100_19_10907__4.pdf]
